# Supplementary material
Source: Springer Nature journal article supplement (https://www.springermedizin.de/resource/supplementary/13550_2013_142_MOESM1_ESM.pdf/9687680)

Assessed for eligibility and meeting  
the criteria of early-stage  
Parkinson's disease (n=77)

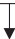

[<sup>123</sup>I]β-CIT SPECT imaging (n=77)

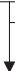

Further analysis (n=50)

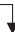

Excluded:  
Other diagnosis (n=10)  
Lost to follow-up (n=16)  
Uncertain diagnosis (n=1)

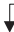

Dyskinesias (n=23)

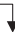

No dyskinesias (n=27)

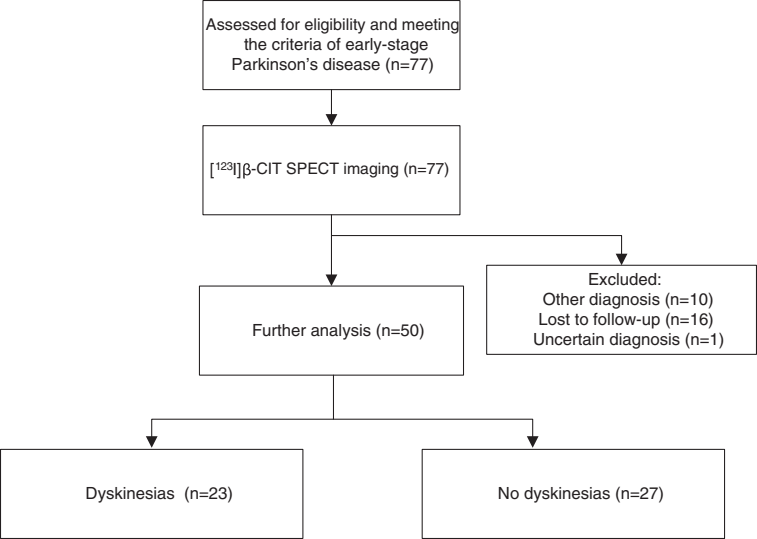

Supplement: MOESM1 [file 9687680]
